# Supplementary material for: Luminescence-colour-changing sensing of Mn2+ and Ag+ ions based on a white-light-emitting lanthanide coordination polymer
Source: Royal Society of Chemistry journal article supplement (doi:10.1039/c7cc00258k), 2017-01-01
Supplement: c7cc00258k1.pdf [file c7cc00258k1.pdf]

## Electronic Supporting Information (ESI)

# **Mn<sup>2+</sup> and Ag<sup>+</sup> luminescence-colour-changing sensing based on white-light-emitting lanthanide coordination polymer**

Yu-xin Li, Shang-ju Li, Peng-fei Yan, Xin-yu Wang, Xu Yao, Guang-hui An and Guang-ming Li\*

### Content

1. Experimental section
  - 1.1 Materials and instrumentation
  - 1.2 Synthesis of the complexes **1 – 4**
2. Results and discussion
  - 2.1 Crystallographic data, selected bonds lengths (Å) and bonds angles (°) for **1 – 3**
  - 2.2 3D structure of the complexes
  - 2.3 FT-IR, UV, TG-DSC and PXRD spectra for complexes **1 – 4**
  - 2.4 Luminescent properties of **1 – 4**
  - 2.5 Ag<sup>+</sup> and Mn<sup>2+</sup> sensing properties of **4**

## 1. Experimental section

### 1.1 Materials and Instrumentation

The commercially available chemicals were of analytical reagent grade and used without further purification. L-DBTA (99 %, Scheme S1) was purchased from Aladdin Co. (Shanghai, China).  $\text{LnCl}_3 \cdot 6\text{H}_2\text{O}$  was prepared according to the literature by dissolving 99.99 % oxide in a slight excess of hydrochloric acid.<sup>1</sup> The solution was evaporated and the precipitate was recrystallized from water.

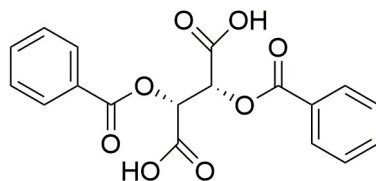

**Scheme S1.** The structure of the ligand L-DBTA

Elemental (C, H, N and O) analyses were performed with an Elementar Vario EL cube analyser. Fourier transform infrared (FT-IR) spectra were obtained on a Perkin-Elmer Spectrum One spectrophotometer by using KBr disks in the range of  $4000 - 450 \text{ cm}^{-1}$ . Ultraviolet (UV) spectra were recorded on a Perkin-Elmer Lambda 25 spectrometer. Thermal analyses were conducted on a Perkin-Elmer STA 6000 with a heating rate of  $10 \text{ }^\circ\text{C} \cdot \text{min}^{-1}$  in a temperature range from  $30$  to  $800 \text{ }^\circ\text{C}$  under air atmosphere. Powder X-ray diffraction (PXRD) data were recorded on a Rigaku D/Max-3B X-ray diffractometer with  $\text{Cu K}\alpha$  as the radiation source ( $\lambda = 0.15406 \text{ nm}$ ) in the angular range of  $\theta = 10 - 60 \text{ }^\circ$ . Crystal data of the complexes were collected using a Xcalibur, Eos, Gemini diffractometer with  $\text{Mo K}\alpha$  radiation ( $\lambda = 0.71073 \text{ \AA}$ ). All data were collected at a temperature of  $23 \pm 2 \text{ }^\circ\text{C}$ . The structures were solved by the direct methods and refined on F2 by full-matrix least-squares using the SHELXTL-97 program. The Ln (III) ions were easily located and then non-hydrogen atoms (C, N and O) were placed from the subsequent Fourier-difference maps. All non-hydrogen atoms were refined anisotropically. A summary of data collection and refinements is given in Table S1 and S2. Excitation and emission spectra were measured with an Edinburgh FLS 920 fluorescence spectrophotometer. Luminescence lifetimes were recorded with a single photon counting spectrometer from Edinburgh Instruments (FLS920) with a microsecond pulse lamp and a picosecond laser as the excitation sources. The data were analysed by software supplied by Edinburgh Instruments. The quantum yields for the complexes were determined at room temperature through an absolute method using an Edinburgh Instruments' integrating sphere coupled to a modular Edinburgh FLS 920 fluorescence spectrophotometer. The values reported are the

average of three independent determinations for each sample. The absolute quantum yield was calculated using the following expression:

$$\Phi = \frac{\int L_{\text{emission}}}{\int E_{\text{reference}} - \int E_{\text{sample}}} \quad (1)$$

where  $L_{\text{emission}}$  is the emission spectrum of the sample, collected using the sphere,  $E_{\text{sample}}$  is the spectrum of the incident light used to excite the sample, collected using the sphere, and  $E_{\text{reference}}$  is the spectrum of the light used for excitation with only the reference in the sphere. The method is accurate to within 10 %. The commission Internationale de l'Eclairage (CIE) color coordination was calculated on the basis of the international CIE standards.<sup>2</sup>

## 1.2 Synthesis of the complexes 1 – 4

A mixture of L-DBTA (0.358 g, 1 mmol) and triethylamine ( $\text{Et}_3\text{N}$ , 0.2 g, 2 mmol) in methanol (8 ml) was stirred for ten minutes at room temperature. Then the solution was slowly diffused into a 15 mm  $\times$  150 mm test tube, which was already added to a solution of  $\text{LnCl}_3 \cdot 6\text{H}_2\text{O}$  (0.66 mmol) in  $\text{H}_2\text{O}$  (8 ml). Crystals suitable for X-ray determination were obtained in two days.

For the complexes **4**, the synthetic methods are the same as the aforementioned, except that the lanthanide salt solution is replaced by a mixed solution, according to the molar ratio in  $\text{Sm}:\text{Eu}:\text{Tb} = 1:1:3$ .

$\{\text{Et}_3\text{NH}[\text{Sm}(\text{L-DBTA})_2(\text{CH}_3\text{OH})_2(\text{H}_2\text{O})_2] \cdot 2\text{H}_2\text{O}\}_n$  (**1**). Yield: 0.409 g (57.0 wt%). Anal. Calcd. for  $\text{C}_{44}\text{H}_{56}\text{NO}_{22}\text{Sm}$  (wt %): C, 47.99; H, 5.13; N, 1.27; O, 32.3. Found (wt %): C, 48.01; H, 5.11; N, 1.31; O, 32.3. IR (KBr pellet,  $\text{cm}^{-1}$ ): 3369(s,  $\nu_{\text{O-H}}$ ), 1720(s,  $\nu_{\text{C=O}}$ ), 1602(s,  $\nu_{\text{C=O}}$ ), 1433(m), 1272(s), 1123(s). UV-vis (MeOH, nm): 230, 274, 281.

$\{\text{Et}_3\text{NH}[\text{Eu}(\text{L-DBTA})_2(\text{CH}_3\text{OH})_2(\text{H}_2\text{O})_2] \cdot 2\text{H}_2\text{O}\}_n$  (**2**). Yield: 0.398 g (54.7 wt%). Anal. Calcd. for  $\text{C}_{44}\text{H}_{56}\text{NO}_{22}\text{Eu}$  (wt %): C, 47.92; H, 5.12; N, 1.27; O, 32.2. Found (wt %): C 47.79; H, 5.16; N, 1.22; O, 32.1. IR (KBr pellet,  $\text{cm}^{-1}$ ): 3328(s,  $\nu_{\text{O-H}}$ ), 1720(s,  $\nu_{\text{C=O}}$ ), 1602(s,  $\nu_{\text{C=O}}$ ), 1451(m), 1271(s), 1120(s). UV-vis (MeOH, nm): 231, 274, 281.

$\{\text{Et}_3\text{NH}[\text{Tb}(\text{L-DBTA})_2(\text{CH}_3\text{OH})_2(\text{H}_2\text{O})_2] \cdot 2\text{H}_2\text{O}\}_n$  (**3**). Yield: 0.388 g (53.0 wt%). Anal. Calcd. for  $\text{C}_{44}\text{H}_{56}\text{NO}_{22}\text{Tb}$  (wt %): C, 47.62; H, 5.09; N, 1.26; O, 32.0. Found (wt %): C, 47.70; H, 5.11; N, 1.20; O,

32.1. IR (KBr pellet,  $\text{cm}^{-1}$ ): 3328(s,  $\nu_{\text{O-H}}$ ), 1721(s,  $\nu_{\text{C=O}}$ ), 1603(s,  $\nu_{\text{C=O}}$ ), 1451(m), 1272(s), 1119(s). UV-vis (MeOH, nm): 230, 274, 281.

$\{\text{Et}_3\text{NH}[(\text{Sm}_{0.2}\text{Eu}_{0.2}\text{Tb}_{0.6})(\text{L-DBTA})_2(\text{CH}_3\text{OH})_2(\text{H}_2\text{O})_2]\cdot 2\text{H}_2\text{O}\}_n$  (**4**). Yield: 0.340 g (46.6 wt%). Anal. Calcd. for  $\text{C}_{44}\text{H}_{56}\text{NO}_{22}\text{Sm}_{0.2}\text{Eu}_{0.2}\text{Tb}_{0.6}$  (wt %): C, 47.75; H, 5.10; N, 1.27; O, 31.80. Found (wt %): C, 47.70; H, 5.11; N, 1.27; O, 32.03. IR (KBr pellet,  $\text{cm}^{-1}$ ): 3328(s,  $\nu_{\text{O-H}}$ ), 1721(s,  $\nu_{\text{C=O}}$ ), 1603(s,  $\nu_{\text{C=O}}$ ), 1451(m), 1272(s), 1119(s). UV-vis (MeOH, nm): 230, 274, 281.

## 2. Results and discussion

### 2.1 Crystallographic data, selected bonds lengths ( $\text{\AA}$ ) and bonds angles ( $^\circ$ ) for **1** – **3**

**Table S1.** Crystallographic data for **1** – **3**

| Parameters                                 | <b>1</b> (Sm)                                       | <b>2</b> (Eu)                                       | <b>3</b> (Tb)                                       |
|--------------------------------------------|-----------------------------------------------------|-----------------------------------------------------|-----------------------------------------------------|
| Empirical formula                          | $\text{C}_{44}\text{H}_{56}\text{NO}_{22}\text{Sm}$ | $\text{C}_{44}\text{H}_{56}\text{NO}_{22}\text{Eu}$ | $\text{C}_{44}\text{H}_{56}\text{NO}_{22}\text{Tb}$ |
| Formula weight                             | 1101.25                                             | 1102.86                                             | 1109.82                                             |
| Temperature (K)                            | 293(2) K                                            | 293(2) K                                            | 293(2) K                                            |
| Wavelength ( $\text{\AA}$ )                | 0.71073                                             | 0.71073                                             | 0.71073                                             |
| Crystal system                             | Orthorhombic                                        | Orthorhombic                                        | Orthorhombic                                        |
| Space group                                | $P2_12_12$                                          | $P2_12_12$                                          | $P2_12_12$                                          |
| $a$ ( $\text{\AA}$ )                       | 20.118(4)                                           | 20.072(4)                                           | 20.056(4)                                           |
| $b$ ( $\text{\AA}$ )                       | 16.652(3)                                           | 16.329(4)                                           | 16.412(3)                                           |
| $c$ ( $\text{\AA}$ )                       | 16.747(3)                                           | 16.631(4)                                           | 16.648(3)                                           |
| Volume ( $\text{\AA}^3$ )                  | 5610.1(19)                                          | 5451(2)                                             | 5479.7(19)                                          |
| $Z$                                        | 4                                                   | 4                                                   | 4                                                   |
| Calculated density $\text{Mg/m}^3$         | 1.304                                               | 1.344                                               | 1.345                                               |
| Absorption coefficient( $\text{mm}^{-1}$ ) | 1.118                                               | 1.224                                               | 1.363                                               |
| $F(000)$                                   | 2260                                                | 2264                                                | 2272                                                |
| Reflections collected                      | 50255                                               | 41969                                               | 51678                                               |
| Max. and min. transmission                 | 0.7667/ 0.7289                                      | 0.7990/0.7594                                       | 0.7914/0.7400                                       |
| Data / restraints / parameters             | 12840 / 73 / 616                                    | 9533 / 64 / 617                                     | 12432 / 74 / 616                                    |
| Goodness-of-fit on $F^2$                   | 1.064                                               | 1.052                                               | 1.071                                               |
| R1, wR2( $I > 2\sigma(I)$ )                | 0.0585, 0.1770                                      | 0.0471, 0.1341                                      | 0.0679, 0.1853                                      |
| R1, wR2(all data)                          | 0.0854, 0.0854,                                     | 0.0577, 0.1424                                      | 0.0895, 0.2020                                      |
| $\Delta\rho$ ( $\text{e \AA}^{-3}$ )       | 1.453 and -1.166                                    | 1.253 and -1.158                                    | 1.585 and -2.553                                    |

**Table S2.** Selected bonds lengths (Å) and bonds angles (°) for **1 – 3**

| Bonds             | <b>1</b> (Sm) | <b>2</b> (Eu) | <b>3</b> (Tb) |
|-------------------|---------------|---------------|---------------|
| Ln(1)–O(16)       | 2.397(5)      | 2.390(4)      | 2.346(5)      |
| Ln(1)–O(8)        | 2.419(4)      | 2.407(4)      | 2.395(5)      |
| Ln(1)–O(18)       | 2.460(5)      | 2.442(5)      | 2.398(6)      |
| Ln(1)–O(17)       | 2.439(5)      | 2.424(4)      | 2.386(5)      |
| Ln(2)–O(12)       | 2.371(4)      | 2.368(4)      | 2.344(5)      |
| Ln(2)–O(4)        | 2.396(5)      | 2.379(4)      | 2.366(6)      |
| Ln(2)–O(19)       | 2.481(5)      | 2.484(4)      | 2.445(6)      |
| Ln(2)–O(20)       | 2.448(5)      | 2.430(5)      | 2.407(6)      |
| O(16)–Ln(1)–O(16) | 75.7(2)       | 76.91(19)     | 75.5(2)       |
| O(8)–Ln(1)–O(8)   | 76.5(2)       | 77.0(2)       | 76.5(3)       |
| O(4)–Ln(2)–O(4)   | 78.0(3)       | 78.2(2)       | 77.0(3)       |
| O(12)–Ln(2)–O(12) | 79.5(2)       | 80.3(2)       | 78.9(3)       |

## 2.2 3D structure of the complexes

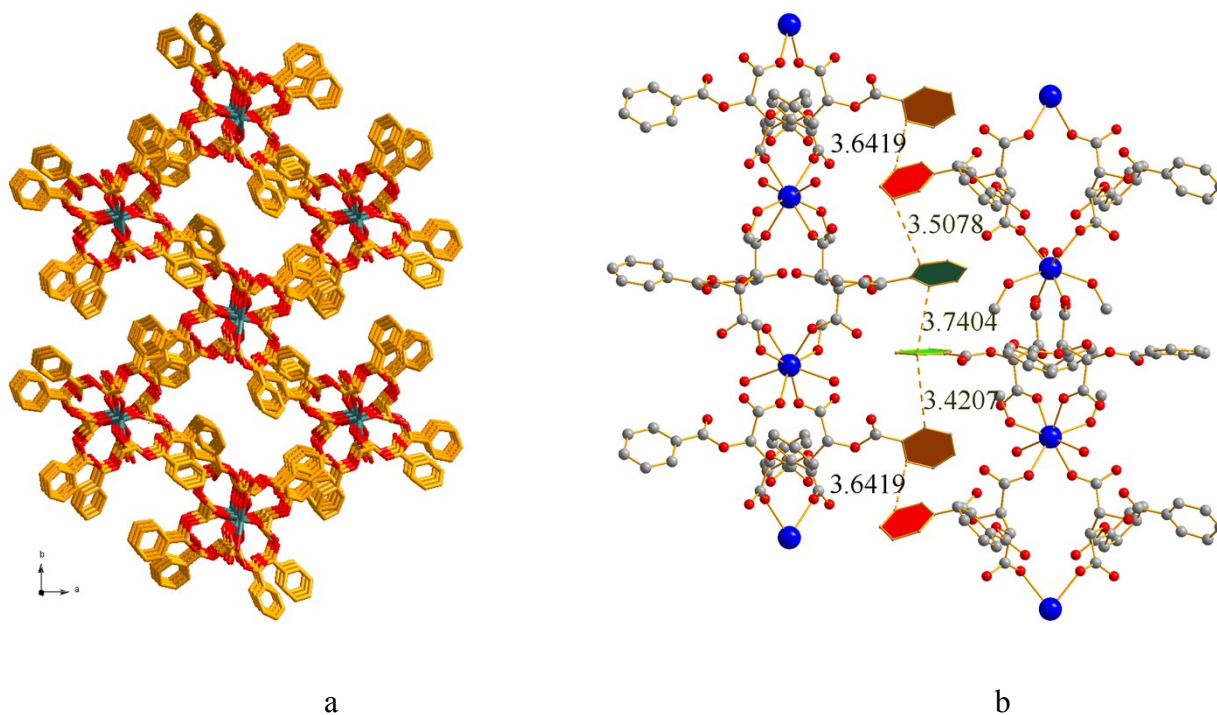

**Figure S1.** a) 3D structure of complex **2** along the *c* axis. All H atoms are omitted for clarity; b)  $\pi$ - $\pi$  stacking of the benzyl groups down the [110] direction

### 2.3 FT-IR, UV, TG-DSC and PXRD spectra for complexes 1 – 4

The FT-IR spectra of complexes **1** – **4** show similar patterns (Figure S2 and Table S3). In a typical spectrum of complex **2**, the broad band around  $3328\text{ cm}^{-1}$  is attributed to the characteristic peak of O-H bonds from the solvent molecules in the complex. The asymmetric and symmetric stretching vibrations of carboxylate groups are observed at  $1720$ ,  $1602$ , and  $1451\text{ cm}^{-1}$ . The appearance of the characteristic band at  $1602\text{ cm}^{-1}$  indicates the deprotonation of the carboxylate groups and coordination to the lanthanide ions. UV-vis absorption spectra of the L-DBTA and complexes **1** – **4** in methanol solution exhibit similar absorbance bands (Figure S3). The main absorption bands at  $231\text{ nm}$  and  $274\text{ nm}$  are attributed to the  $\pi$ - $\pi^*$  and  $n$ - $\pi^*$  transitions of the benzene ring, respectively. Thermal analyses support that there are crystalline solvents in complexes **1** – **4** (Figure S4). For example, complex **2** exhibits a gradual weight loss of  $12.5\%$  in the temperature range of  $30 - 120\text{ }^\circ\text{C}$ , which corresponds to the loss of solvent molecules in complex **2** (calculated  $12.3\%$ ). Other calculations for crystalline solvents in complexes **1** – **4** are shown in Figure S4. PXRD analyses demonstrate that the structures of complexes **1** – **4** are isomorphic and their phase purity was verified by PXRD analyses (Fig. S5).

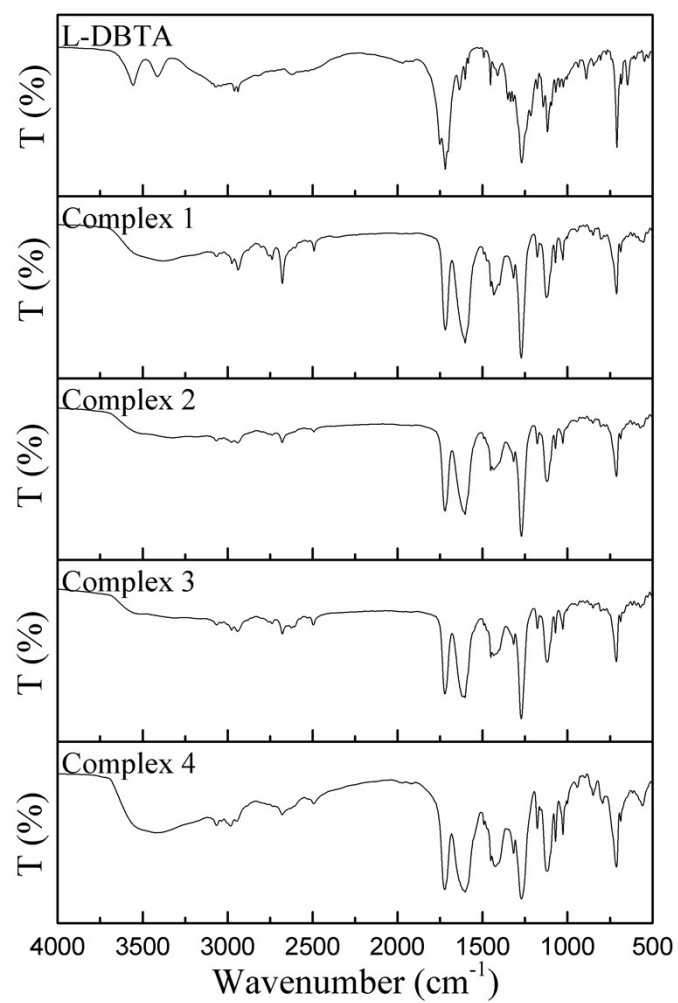

**Figure S2.** FT-IR spectra of ligand L-DBTA and complexes **1 – 4**

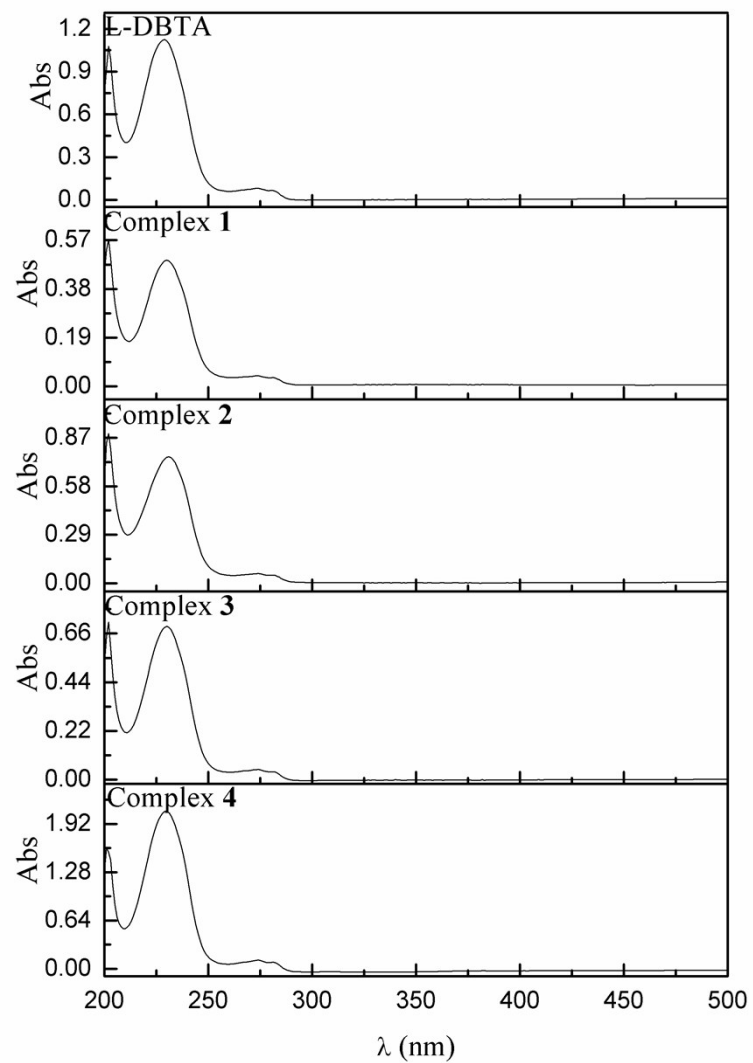

**Figure S3.** UV-vis spectra of L-DBTA and complexes 1–4 in methanol



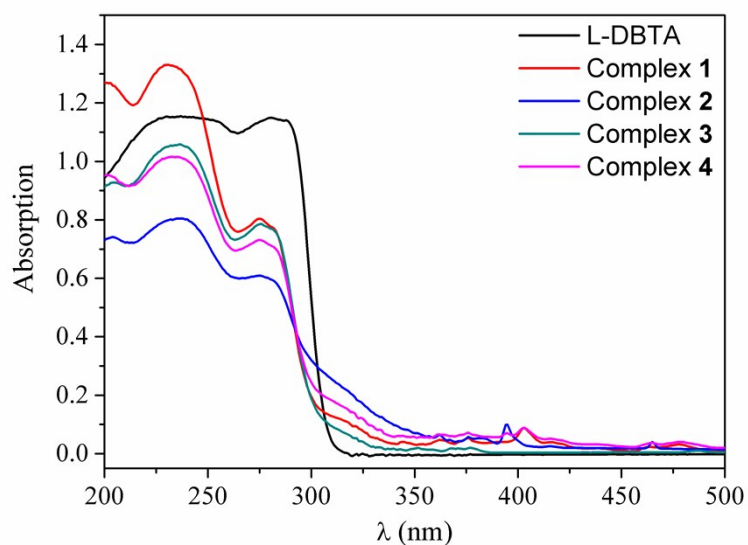

**Figure S4.** UV diffused reflectance of solid-state L-DBTA and complexes 1 – 4

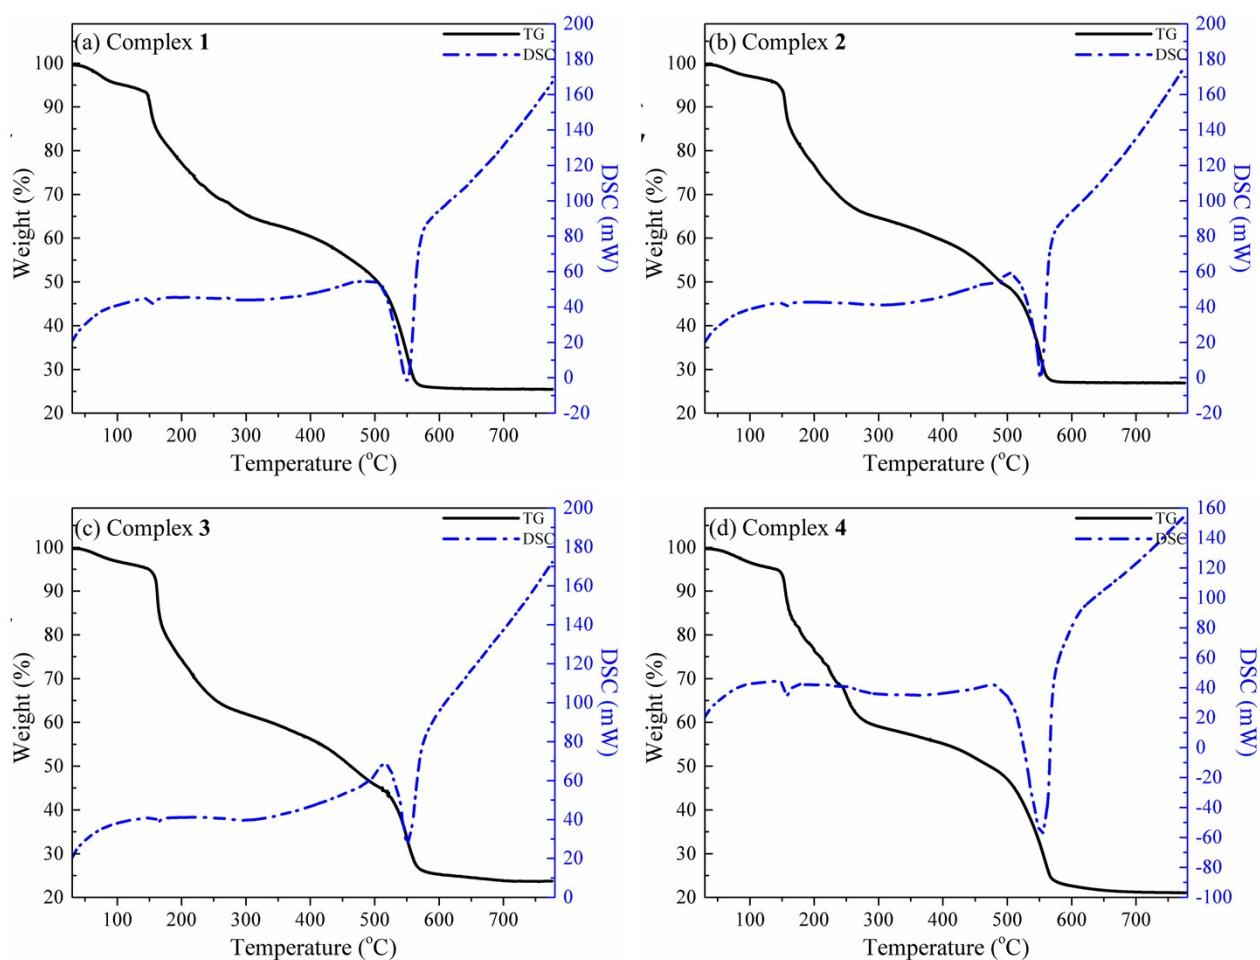

**Figure S5.** TG-DSC curves of complexes 1 – 4

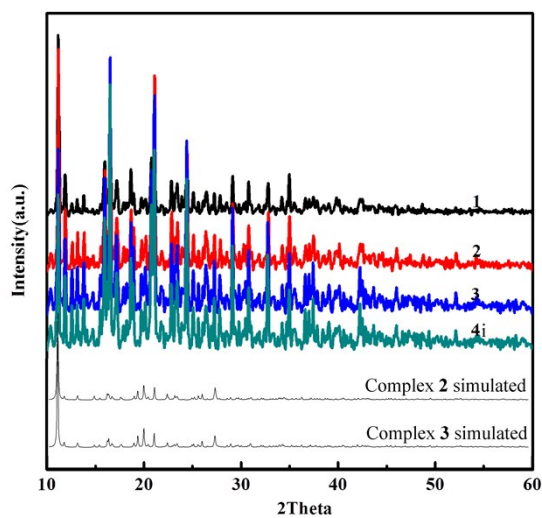

**Figure S6.** PXRD patterns for complexes 1 – 4

## 2.4 Luminescent properties of 1 – 4

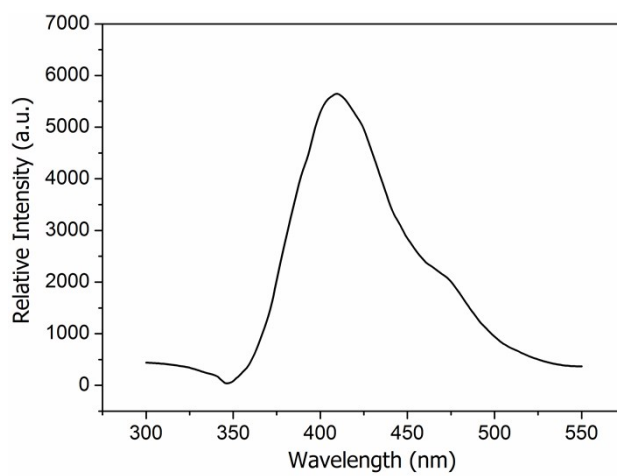

**Figure S7.** The spectrum of the low temperature phosphorescence of gallium complex at 77 K

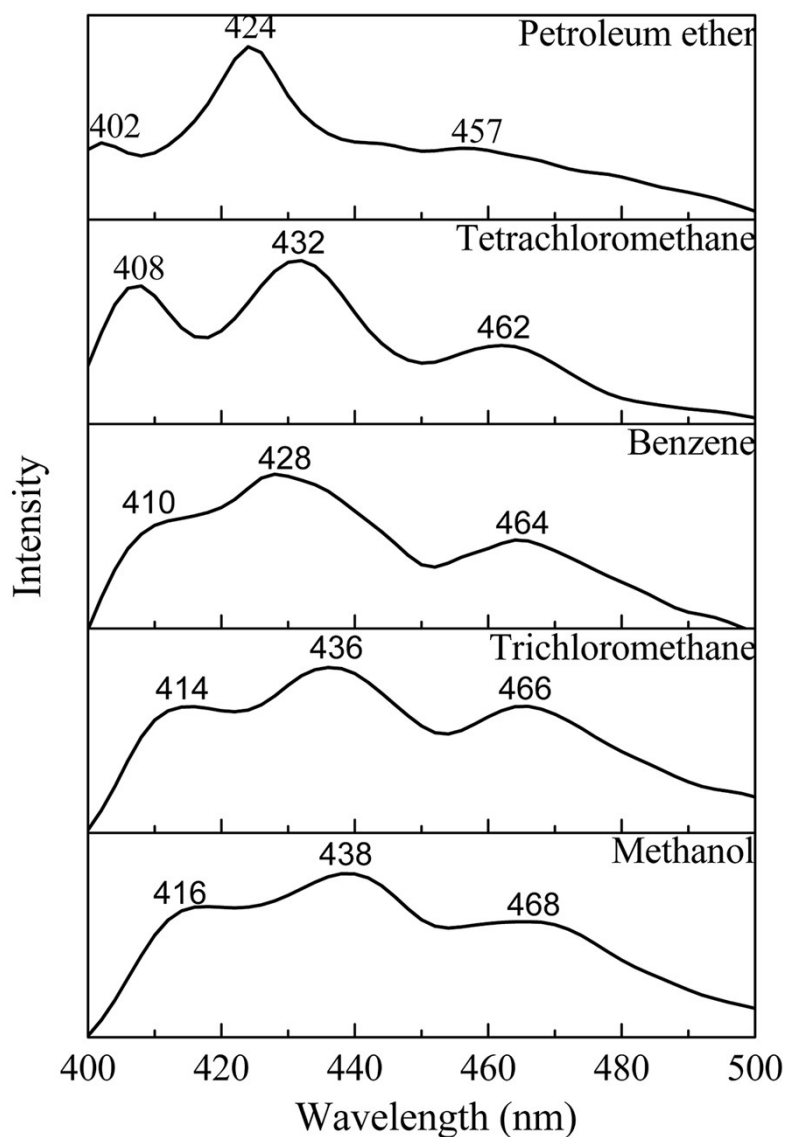

**Figure S8.** Emission spectra of L-DBTA saturated solution in different polar solvent. Alongwith the polar increase of the solvent, the emission peak apparently red-shift, which suggests that the intramolecular charge-transfer exists in the L-DBTA ligand. Comparing with singlet excited state ( $S_1^*$ ) tested by UV spectra, IMCT excited state usually possesses lower energy levels and absorbs longer excitation wavelength, which is an explanation to the mismatch of absorption bands between the UV spectra (228 nm) and excitation spectra (438 nm).

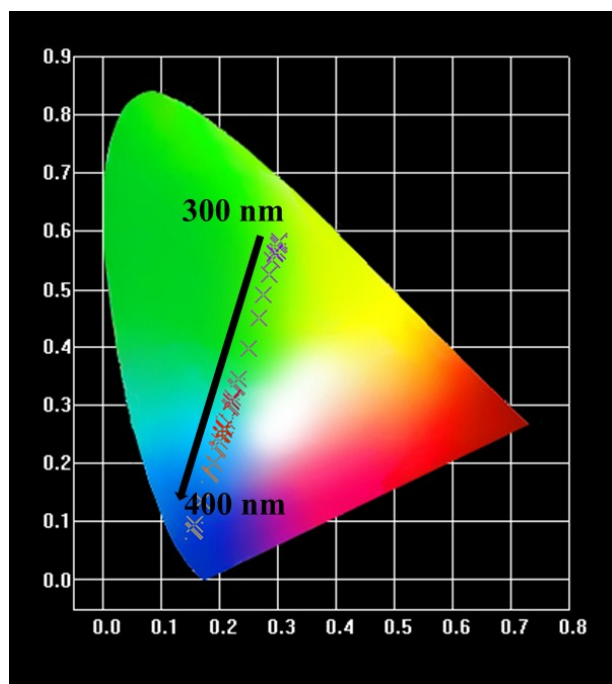

**Figure S9.** CIE-1931 chromaticity diagram showing the emissions of complex **3** varying from green to cyan and to blue by changing the excitation wavelength

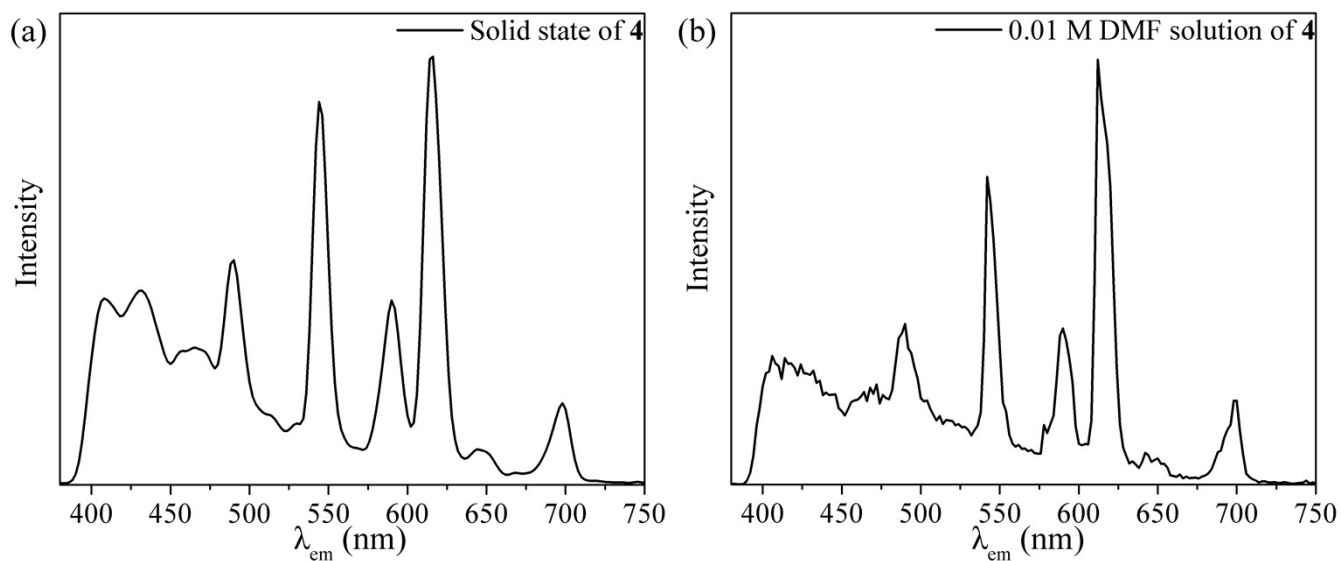

**Figure S10.** Emission spectrum of (a) solid-state and (b) 0.01 M DMF solution of **4** excited at 322 nm

**Table S3.** Color, CIE coordination, lifetimes and quantum yields of complex **1 – 4**

| No.                         | $\lambda_{\text{ex}}$<br>(nm) | Colour | CIE         | $\tau$ (ms)         |                     |                     | $\Phi$ (%)     |
|-----------------------------|-------------------------------|--------|-------------|---------------------|---------------------|---------------------|----------------|
|                             |                               |        |             | 438 nm              | 544 nm              | 614 nm              |                |
| <b>1</b>                    | 378                           | blue   | 0.157;0.112 | 1.1E-3 <sup>a</sup> | -                   | -                   | 2.21           |
| <b>2</b>                    | 394                           | red    | 0.586;0.321 | -                   | -                   | 0.31                | 8.20           |
| <b>3</b>                    | 380                           | green  | 0.291;0.550 | -                   | 1.07                | -                   | 29.1           |
| <b>4</b>                    | 322                           | white  | 0.333;0.334 | 8.4E-4 <sup>a</sup> | 0.65                | 0.12                | 6.50           |
| Ag <sup>+</sup> @ <b>4</b>  | 322                           | red    | 0.408;0.358 | 7.8E-4 <sup>a</sup> | 6.5E-2 <sup>a</sup> | 4.2E-3 <sup>a</sup> | - <sup>b</sup> |
| Mn <sup>2+</sup> @ <b>4</b> | 322                           | blue   | 0.207;0.194 | 8.0E-3 <sup>a</sup> | 5.6E-2 <sup>a</sup> | 1.0E-2 <sup>a</sup> | - <sup>b</sup> |

<sup>a</sup> only  $\tau_1$  is provided<sup>b</sup> the data could be obtained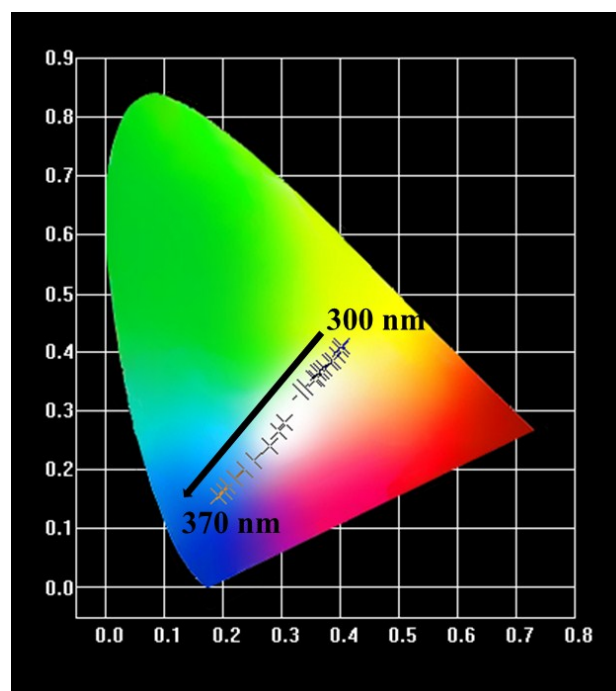**Figure S11.** CIE-1931 chromaticity diagram showing the emissions of complex **4** varying from yellow to white and to blue by changing the excitation wavelength

## 2.5 Ag<sup>+</sup> and Mn<sup>2+</sup> ions sensing properties of 4

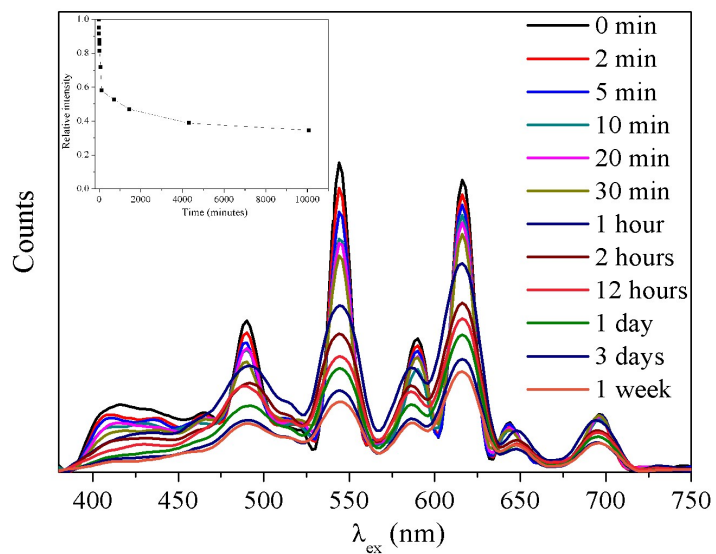

**Figure S12.** Time-dependence luminescent spectrum of Ag<sup>+</sup>@4. The inset is the relation curve of relative intensity with time

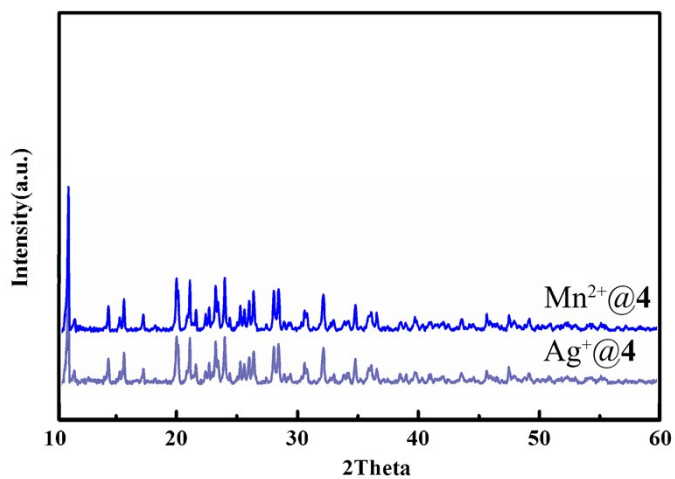

**Figure S13.** PXRD patterns for Ag<sup>+</sup>@4 and Mn<sup>2+</sup>@4

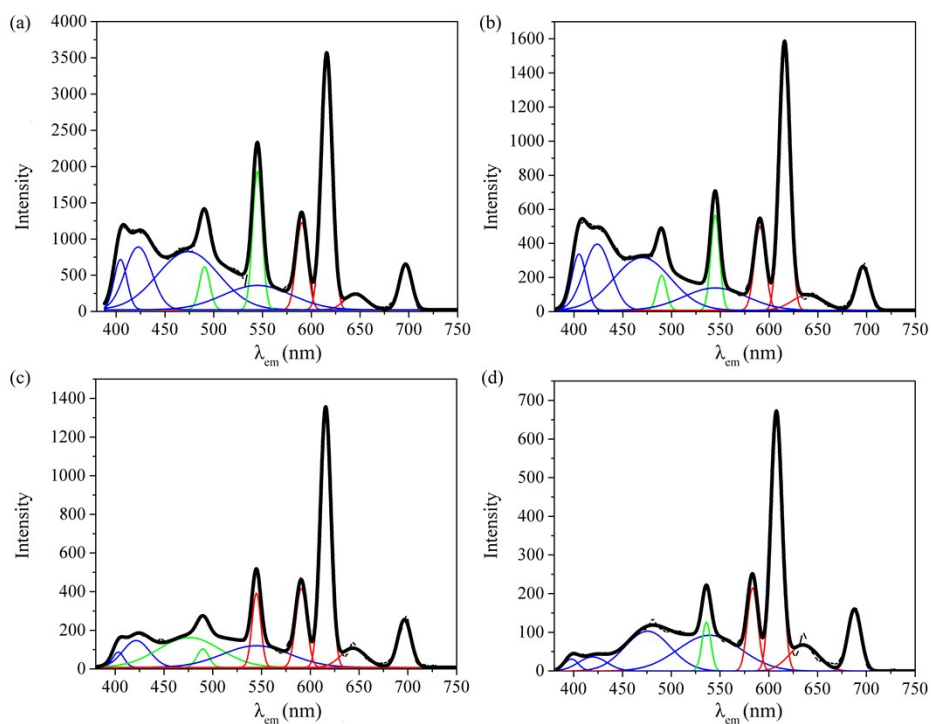

**Figure S14.** Peak fitting for  $\text{Ag}^+\text{@}4$  with the  $\text{Ag}^+$  concentration of (a) blank; (b)  $5 \times 10^{-8}$  M; (c)  $5 \times 10^{-7}$  M and (d) 2 M

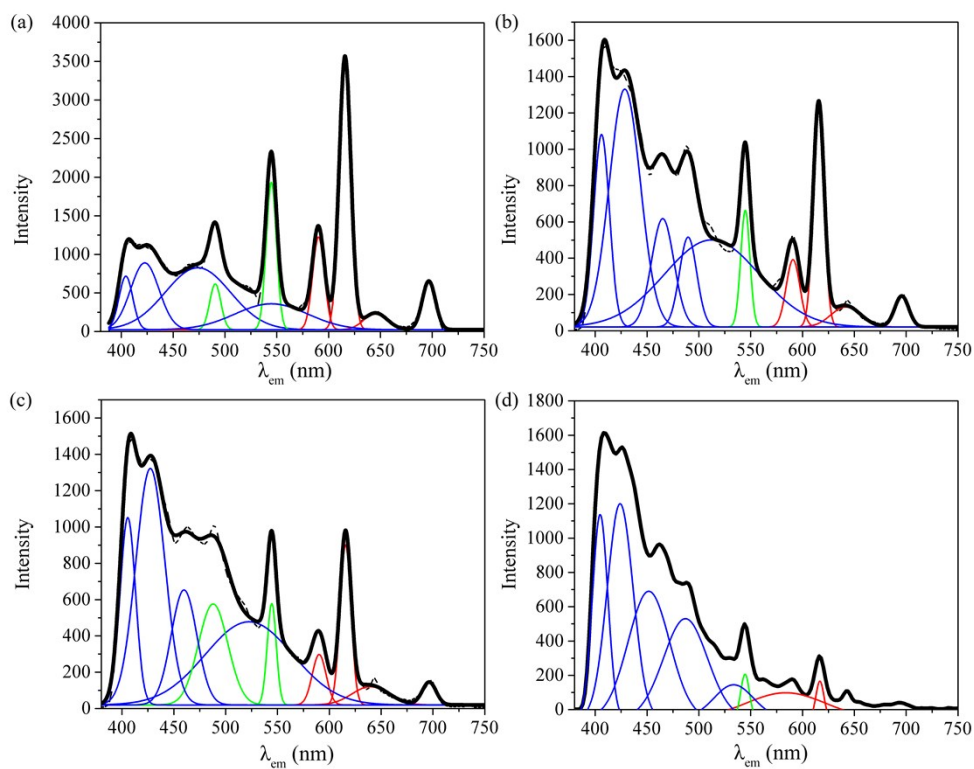

**Figure S15** Peak fitting for  $\text{Mn}^{2+}\text{@}4$  with the  $\text{Mn}^{2+}$  concentration of (a) blank; (b)  $5 \times 10^{-8}$  M; (c)  $5 \times 10^{-7}$  M and (d) 2 M.

**Table S4.** Peak analysis for Ag<sup>+</sup>@4 with distinct Ag<sup>+</sup> concentration

| Ag <sup>+</sup><br>Concentration<br>(M) | wavenumber<br>r (nm) | Area  | Height | FWHM <sup>a</sup> |
|-----------------------------------------|----------------------|-------|--------|-------------------|
| Blank                                   | 404.4                | 11483 | 694    | 15.5              |
|                                         | 422.7                | 29687 | 867    | 32.2              |
|                                         | 473.9                | 63218 | 804    | 73.9              |
|                                         | 490.7                | 7980  | 594    | 12.6              |
|                                         | 544.7                | 23409 | 1912   | 11.5              |
|                                         | 544.7                | 29627 | 336    | 82.7              |
|                                         | 590.2                | 16995 | 1201   | 13.3              |
|                                         | 615.8                | 48711 | 3498   | 13.1              |
|                                         | 645.5                | 5993  | 212    | 26.5              |
|                                         | 696.7                | 10100 | 632    | 15.0              |
| 5×10 <sup>-8</sup>                      | 404.0                | 5980  | 330    | 17.0              |
|                                         | 421.8                | 13434 | 388    | 23.5              |
|                                         | 473.0                | 22610 | 309    | 68.7              |
|                                         | 489.9                | 2482  | 205    | 7.7               |
|                                         | 544.7                | 6340  | 558    | 10.7              |
|                                         | 544.7                | 10700 | 132    | 76.5              |
|                                         | 590.6                | 6962  | 492    | 13.3              |
|                                         | 615.7                | 21071 | 1537   | 12.9              |
|                                         | 639.6                | 3625  | 90     | 37.9              |
|                                         | 696.2                | 4404  | 257    | 16.1              |
| 5×10 <sup>-7</sup>                      | 403.3                | 1152  | 79     | 13.8              |
|                                         | 421.5                | 4772  | 139    | 32.2              |
|                                         | 470.0                | 12290 | 154    | 74.8              |
|                                         | 489.9                | 1438  | 95.0   | 14.2              |
|                                         | 544.8                | 4345  | 383    | 10.6              |
|                                         | 544.8                | 9765  | 112    | 81.8              |
|                                         | 590.8                | 5729  | 408    | 13.2              |
|                                         | 615.7                | 17739 | 1326   | 12.6              |
|                                         | 644.0                | 3161  | 98     | 30.4              |
|                                         | 696.6                | 4216  | 248    | 16.0              |
| 2                                       | 397.7                | 561   | 31     | 16.8              |
|                                         | 419.5                | 1351  | 37     | 34.5              |
|                                         | 475.5                | 6051  | 103    | 55.0              |
|                                         | 536.0                | 1419  | 127    | 10.5              |
|                                         | 539.4                | 7529  | 93     | 76.2              |
|                                         | 583.4                | 2874  | 215    | 12.6              |
|                                         | 607.8                | 9198  | 651    | 13.3              |
|                                         | 635.5                | 2537  | 67     | 35.8              |
|                                         | 687.8                | 2715  | 161    | 15.9              |

<sup>a</sup> full width at half maximum



**Table S5.** Peak analysis for Mn<sup>2+</sup>@4 with distinct Mn<sup>2+</sup> concentration

| Mn <sup>2+</sup> Concentration (M) | wavenumber (nm) | Area  | Height | FWHM <sup>a</sup> |
|------------------------------------|-----------------|-------|--------|-------------------|
| Blank                              | 404.4           | 11483 | 694    | 15.5              |
|                                    | 422.7           | 29687 | 867    | 32.2              |
|                                    | 473.9           | 63218 | 804    | 73.9              |
|                                    | 490.7           | 7980  | 594    | 12.6              |
|                                    | 544.7           | 23409 | 1912   | 11.5              |
|                                    | 544.7           | 29627 | 336    | 82.7              |
|                                    | 590.2           | 16995 | 1201   | 13.3              |
|                                    | 615.8           | 48711 | 3498   | 13.1              |
|                                    | 645.5           | 5993  | 212    | 26.5              |
|                                    | 696.7           | 10100 | 632    | 15.0              |
| 5×10 <sup>-8</sup>                 | 406.1           | 20144 | 1060   | 17.8              |
|                                    | 428.6           | 49345 | 1310   | 34.4              |
|                                    | 475.1           | 16272 | 597    | 25.6              |
|                                    | 492.6           | 10389 | 495    | 19.7              |
|                                    | 512.6           | 55000 | 480    | 107.7             |
|                                    | 544.7           | 7147  | 643    | 10.4              |
|                                    | 590.8           | 6105  | 371    | 15.5              |
|                                    | 615.6           | 15463 | 1188   | 12.2              |
|                                    | 641.7           | 3943  | 110    | 33.6              |
|                                    | 695.7           | 2896  | 171    | 15.9              |
| 5×10 <sup>-7</sup>                 | 406.6           | 19192 | 1032   | 17.5              |
|                                    | 429.4           | 45790 | 1302   | 33.0              |
|                                    | 459.8           | 19722 | 633    | 29.3              |
|                                    | 492.9           | 19798 | 556    | 33.4              |
|                                    | 522.6           | 48485 | 458    | 99.5              |
|                                    | 544.5           | 6079  | 559    | 10.2              |
|                                    | 590.2           | 4622  | 278    | 15.6              |
|                                    | 615.7           | 11578 | 882    | 12.3              |
|                                    | 639.6           | 4455  | 101    | 41.5              |
|                                    | 696.4           | 2098  | 125.6  | 15.7              |
| 2                                  | 408.8           | 22089 | 1190   | 17.4              |
|                                    | 434.0           | 39256 | 1253   | 29.4              |
|                                    | 461.7           | 37182 | 743    | 47.0              |
|                                    | 487.1           | 31039 | 583    | 50.0              |
|                                    | 533.7           | 9491  | 197.6  | 45.1              |
|                                    | 544.5           | 2724  | 259    | 9.9               |
|                                    | 583.9           | 14329 | 151    | 89.0              |
|                                    | 616.8           | 2114  | 219    | 9.1               |
|                                    | 640.0           | 802   | 175    | 8.7               |
|                                    | 696.4           | 418   | 66     | 12.2              |

<sup>a</sup> full width at half maximum

## Reference

- [1]. F. Zhang, P. Yan, H. Li, X. Zou, G. Hou and G. Li, *Dalton Trans.*, 2014, **43**, 12574.
- [2]. T. Smith and J. Guild, *Trans. Opt. Soc.*, 1931, **33**, 73.
- [3]. W. Niu, P. Yan, Z. Fan, N. Fan, J. Sun and G. Li, *Sci. Adv. Mater.*, 2016, **8**, 2189.
